# Supplementary material for: An analytical generalization of Budyko framework with physical accounts of climate seasonality and water storage capacity
Source: Copernicus journal article supplement (doi:10.5194/hess-2022-309), 2022-09-15
Supplement: Supplementary file 1 [file hess-2022-309-supplement.pdf]

**Supplementary Information for**  
**An analytical generalization of Budyko framework with**  
**physical accounts of climate seasonality and water storage**  
**capacity**

Xu Zhang<sup>1\*</sup>, Jinbao Li<sup>1</sup>, Qianjin Dong<sup>2</sup>, Ross A. Woods<sup>3</sup>

<sup>1</sup> Department of Geography, University of Hong Kong, Hong Kong SAR, China

<sup>2</sup> State Key Laboratory of Water Resources and Hydropower Engineering Science, Wuhan  
University, Wuhan 430072, China

<sup>3</sup> Department of Civil Engineering, University of Bristol, Bristol, UK

\*Correspondence to: Xu Zhang (zhangxu\_hku@connect.hku.hk)

**Contents of this file**

- Figure S1-S5

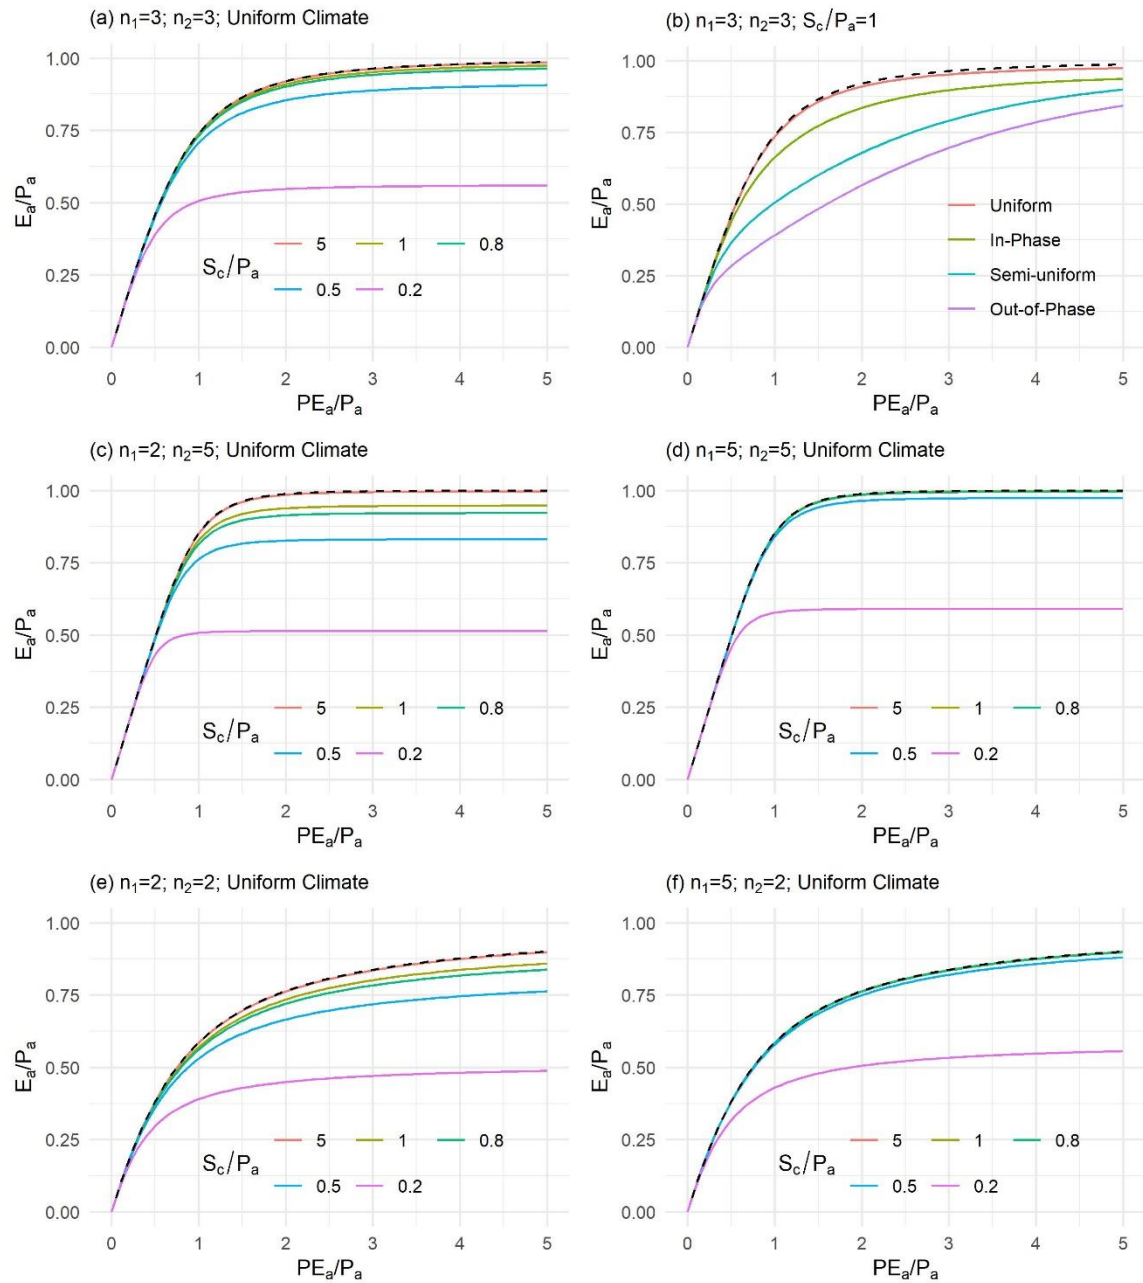

Figure S1 The same as Figure 2 but using Yang-Fu equation. The black dashed line is simulated from Fu equation with its parameter equal to  $n_2$ .

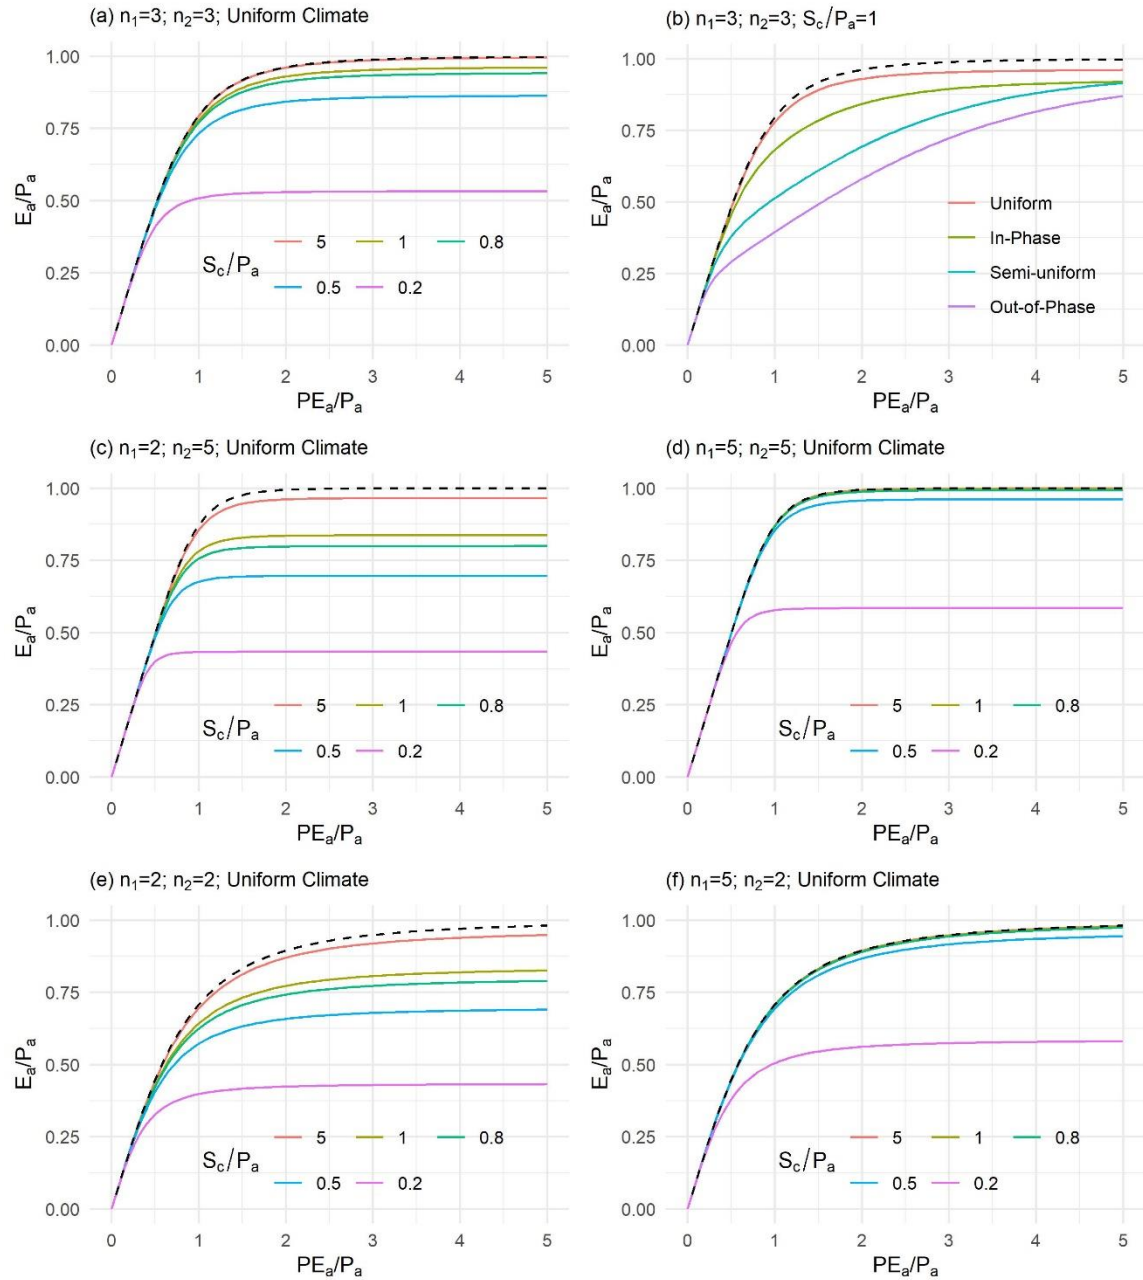

Figure S2 The same as Figure 2 but using Fu - Yang equation. The black dashed line is simulated from Yang equation with its parameter equal to  $n_2$ .

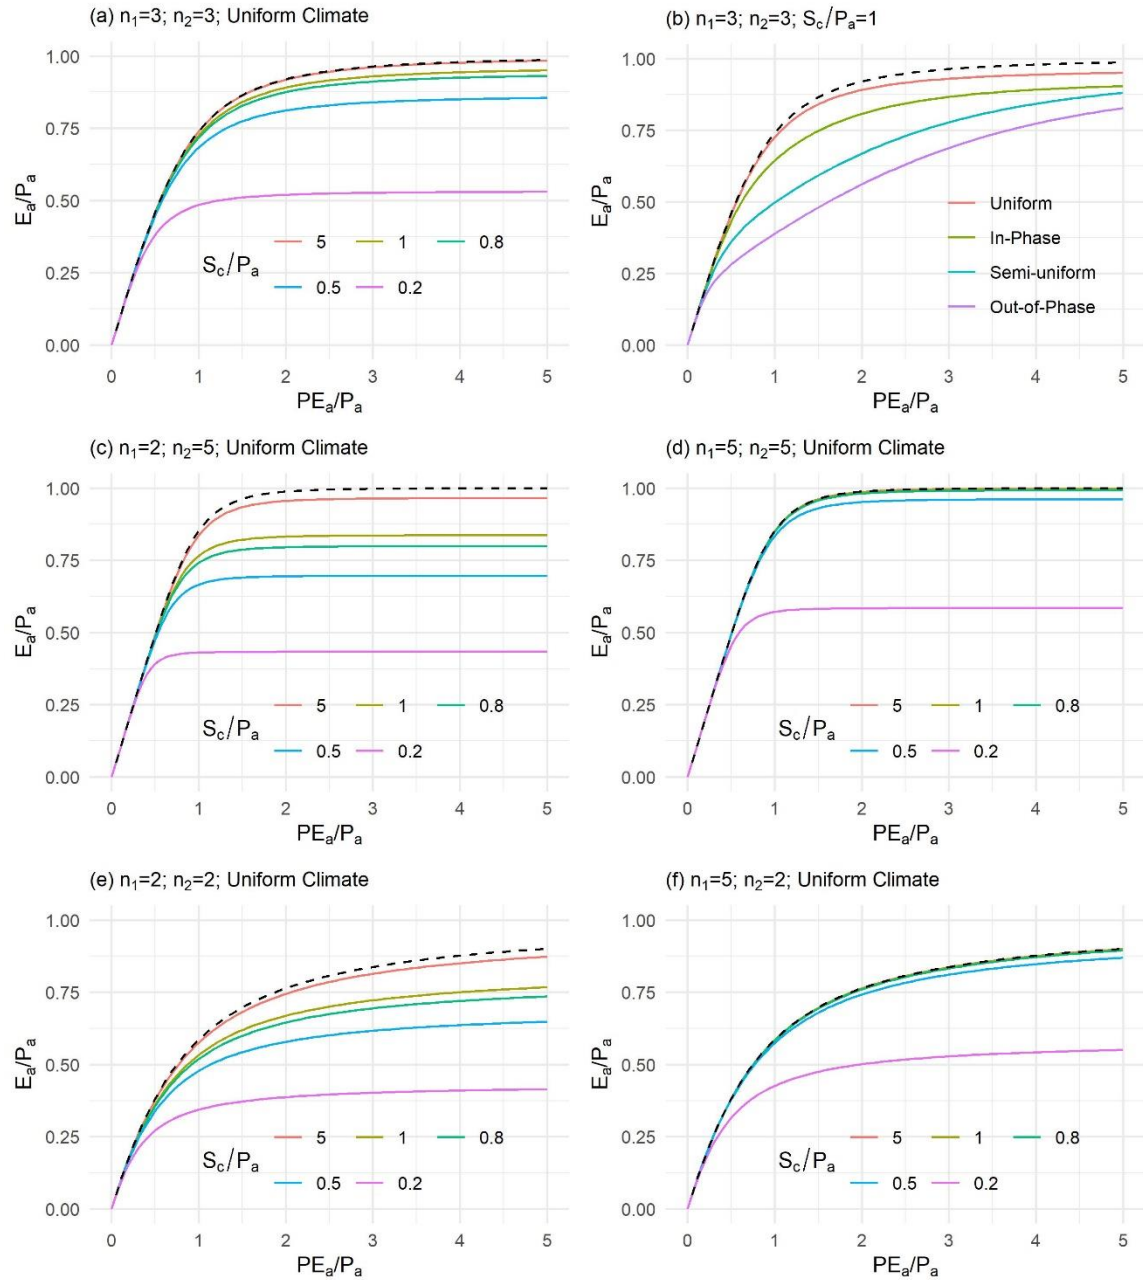

Figure S3 The same as Figure 2 but using Fu-Fu equation. The black dashed line is simulated from Fu equation with its parameter equal to  $n_2$ .

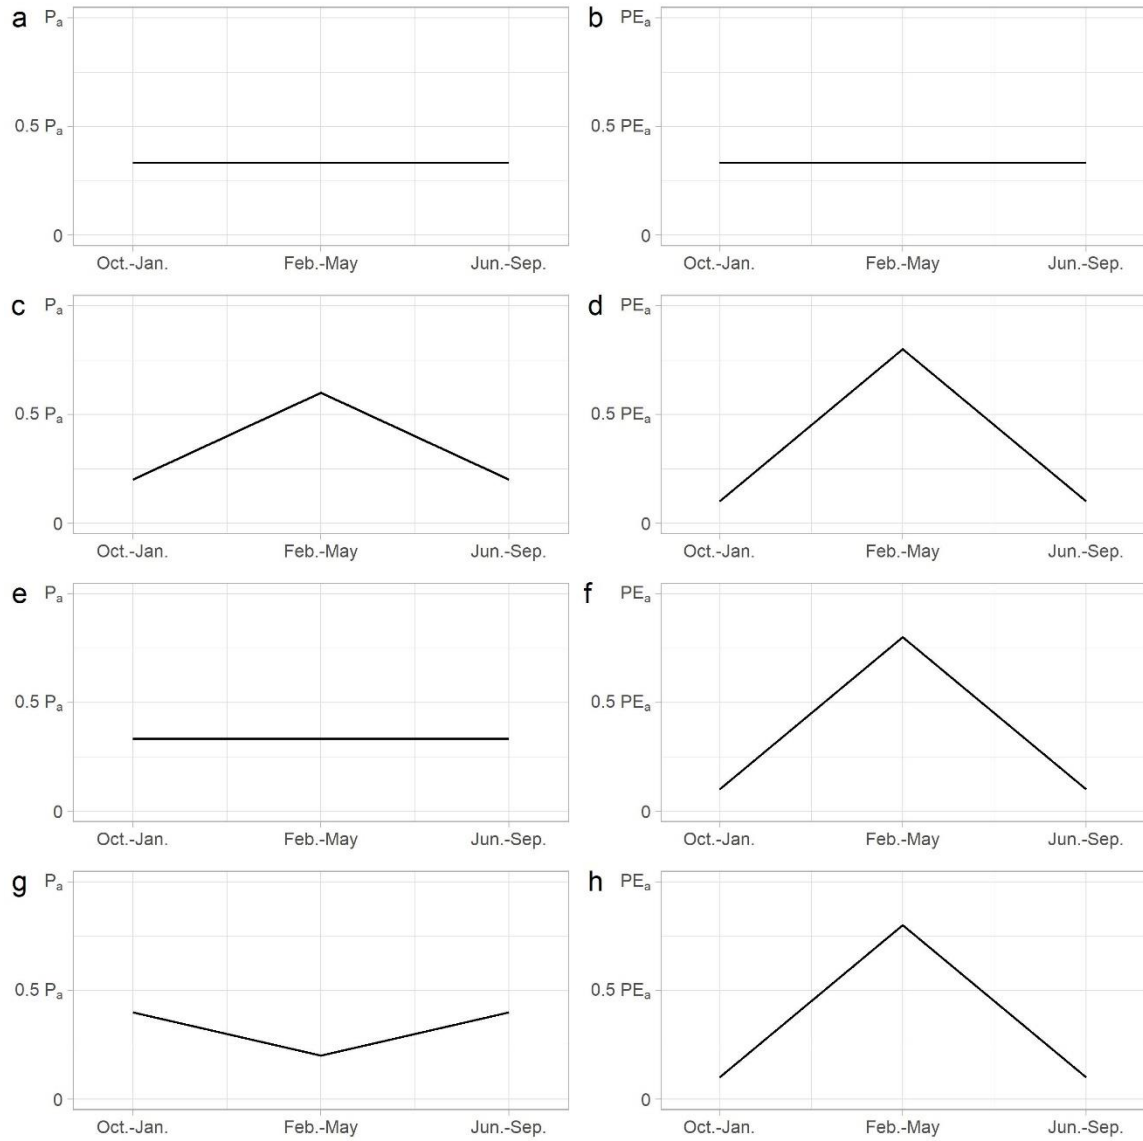

Figure S4 The temporal distributions of precipitation (a, c, e, and g) and potential evaporation (b, d, f, and h) in uniform (a, b), in-phase (c, d), semi-uniform (e, f), and out-of-phase (g, h) climates throughout year.

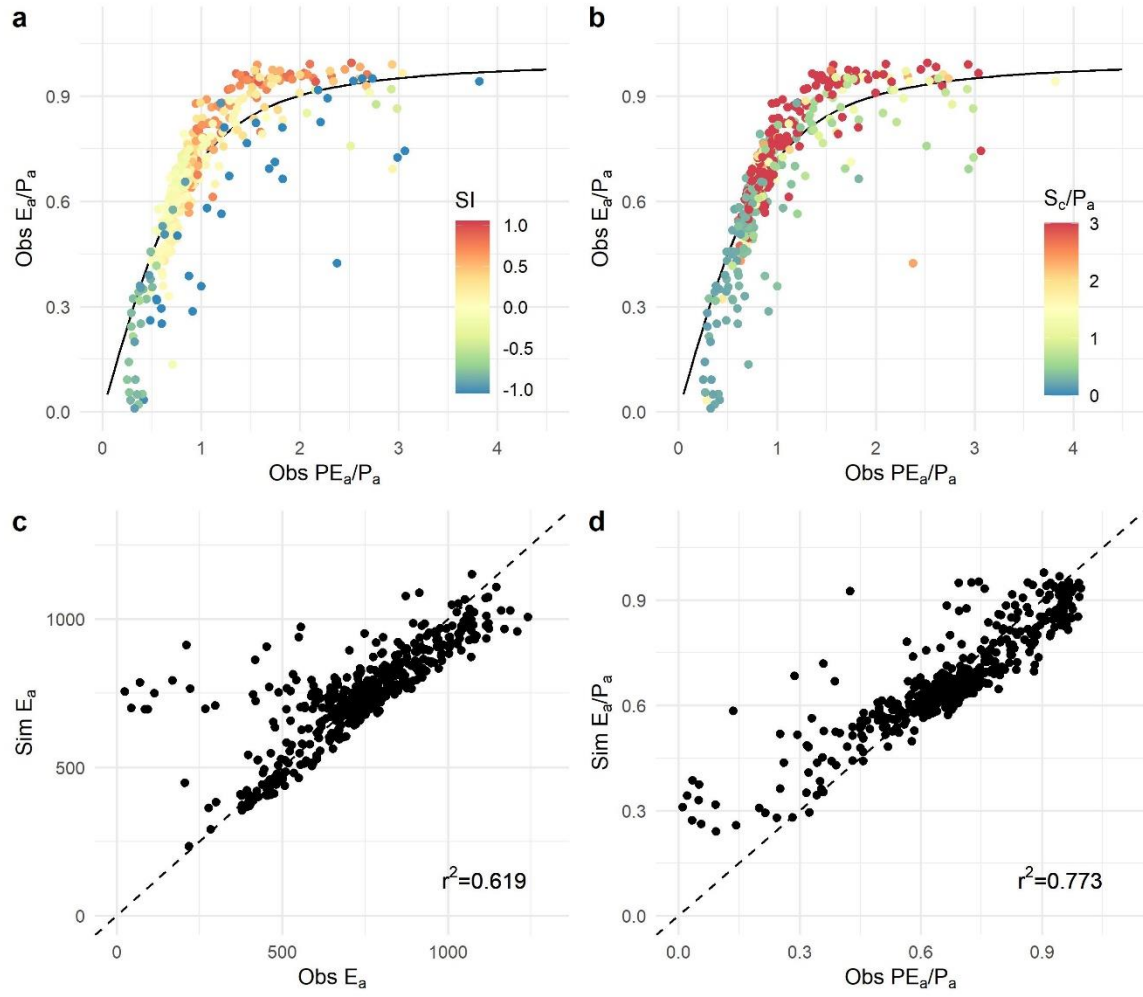

Figure S5 The same as Figure 3 but using Fu equation.
